# Supplementary material
Source: publisher figshare collection journal article supplement (https://acs.figshare.com/ndownloader/files/13894799)
Supplement: Supplementary file 1 [file 13894799]

## Supplemental Figures

Title: "Ginkgolide A prevents the A $\beta$ -induced depolarization of cortical neurons"

Author(s): Kuo, Li-Chen; Song, Yan-Qing; Yao, Chien-An; Cheng, Irene; Chien, Chiang-Ting; Lee, Guan-Chiun; Yang, Wen-Chin; Lin, Yenshou

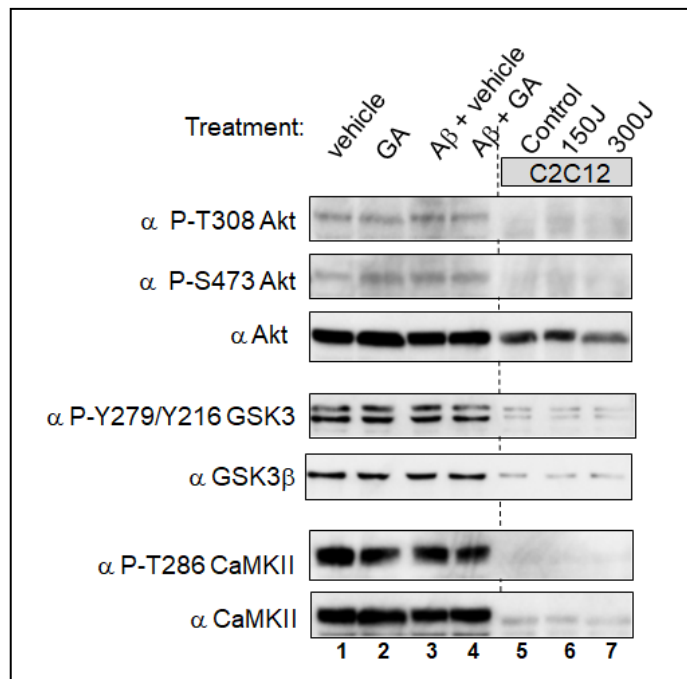

### Supplemental Fig S1. Ginkgolide A ameliorates A $\beta$ -induced neuronal JNK

**phosphorylation, but not Akt/GSK/CaMKII signaling.** Primary cortical neurons were cultivated for 6 days and then preincubated with vehicle or 10  $\mu$ M ginkgolide A for 2 h, which was followed by 2.7  $\mu$ M A $\beta$  treatment for 9 h. The cell lysates then underwent Western blot analysis in order to detect various proteins and related signaling molecules. Lysates from C2C12 myoblasts that had been treated with UV irradiation were used as antibody controls. These blots are representative of experiments that was repeated three times.

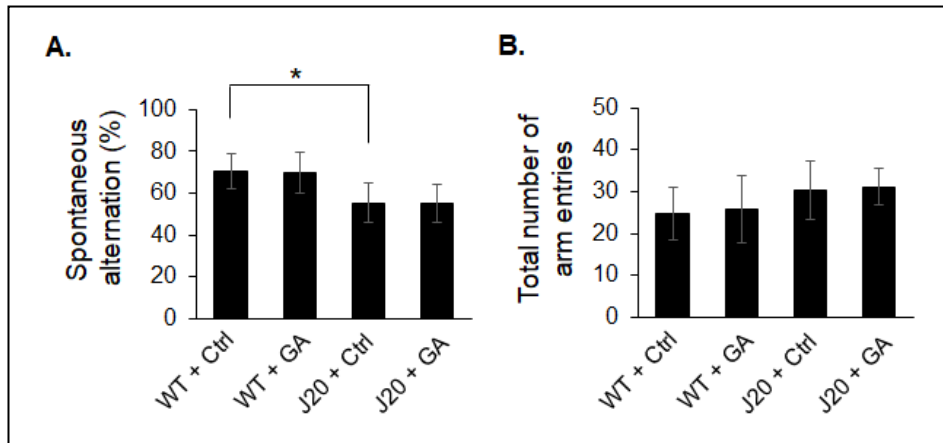

**Supplemental Fig S2. Ginkgolide A (GA) shows no effect when the mice are tested using a Y maze.** (A) The wild-type and J20 mice were injected with either vehicle or GA at around 6 months of age. A dosage 30 mg/kg body weight five days a week for 4 weeks was administrated via subcutaneous injection. At around the 7<sup>th</sup> month, mice were subjected to the Y maze test. The y-axis represents the spontaneous alteration level (%). (B) The total number of arm entries in the Y maze test was counted. Data are shown as the means  $\pm$  SD (n=6~7). \*  $p < 0.05$ .
